# Supplementary material for: Patients awaiting surgery for neurosurgical diseases during the first wave of the COVID-19 pandemic in Spain: a multicentre cohort study
Source: HighWire-hosted journal article supplement (doi:10.1136/bmjopen-2022-061208), 2022-08-01
Supplement: bmjopen-2022-061208supp001_data_supplement.pdf [file bmjopen-2022-061208supp001_data_supplement.pdf]

| PROVIDER PROFILING                                                                             |                                                               |
|------------------------------------------------------------------------------------------------|---------------------------------------------------------------|
| Record ID                                                                                      |                                                               |
| SURVEY RESPONDENT                                                                              |                                                               |
| Are you medically qualified?                                                                   | Yes                                                           |
|                                                                                                | No                                                            |
| What is your medical qualification?                                                            | Resident                                                      |
|                                                                                                | Staff                                                         |
| Number of years of your expertise                                                              |                                                               |
| HOSPITAL CHARACTERISTICS                                                                       |                                                               |
| Type of healthcare facility                                                                    | Government                                                    |
|                                                                                                | Private                                                       |
| Type of hospital                                                                               | Primary-level hospital                                        |
|                                                                                                | Secondary-level hospital                                      |
|                                                                                                | Tertiary-level hospital                                       |
| City                                                                                           |                                                               |
| NEUROSURGERY DEPARTMENT CHARACTERISTICS                                                        |                                                               |
| Total number of beds dedicated to neurosurgical patients                                       |                                                               |
| Does your neurosurgical unit manage just adults, just children or both?                        | Adults only                                                   |
|                                                                                                | Children only                                                 |
|                                                                                                | Both                                                          |
| Number of members of your department                                                           |                                                               |
| Number of theatres scheduled per week                                                          |                                                               |
| Number of craniotomies done in the last year                                                   |                                                               |
| Number of spinal surgeries done in the last year                                               |                                                               |
| Number of urgent surgeries done in the last year                                               |                                                               |
| Is there at least one staff neurosurgeon on call everyday?                                     | Yes                                                           |
|                                                                                                | No                                                            |
| Is your institution the unit that manages cerebrovascular emergencies?                         | Yes, we manage all cerebrovascular emergencies referred to us |
|                                                                                                | Yes, but there is a                                           |
|                                                                                                | No, we routinely transfer such cases to a different centre    |
| Is your institution the unit that manages severe TBI and Spinal cord Injury emergencies?       | Yes, we manage all emergencies referred to us                 |
|                                                                                                | No, we routinely transfer such cases to a different centre    |
| STRATEGIES DEVELOPED TO DEAL WITH COVID-19 PANDEMIC                                            |                                                               |
| What is the maximum percentage of total beds occupation to COVID patients during the pandemic? | <20%                                                          |
|                                                                                                | 20-50%                                                        |
|                                                                                                | 50-80%                                                        |
|                                                                                                | >80%                                                          |
| Do you routinely perform screening of COVID-19 infection before elective surgery?              | Yes, in all cases                                             |
|                                                                                                | Yes, but only in the case of suspicion                        |
|                                                                                                | No                                                            |

|                                                                                                                                            |                                                                                                                                            |
|--------------------------------------------------------------------------------------------------------------------------------------------|--------------------------------------------------------------------------------------------------------------------------------------------|
| <b>What type of test do you usually use at your institution?</b>                                                                           | Structured questionnaire                                                                                                                   |
|                                                                                                                                            | Swab test                                                                                                                                  |
|                                                                                                                                            | CT thorax                                                                                                                                  |
| <b>What is the time period considered valid between the test and the surgery ?</b>                                                         | 24h                                                                                                                                        |
|                                                                                                                                            | 48-72h                                                                                                                                     |
|                                                                                                                                            | >72h                                                                                                                                       |
| <b>At the scenario of a patient requiring urgent surgery for a life-threatening condition, what do you usually do at your institution?</b> | A swab test is done, and the procedure is performed following recommendations for confirmed COVID-19 patients                              |
|                                                                                                                                            | A CT-thorax is done and the procedure is performed depending of the findings revealed                                                      |
|                                                                                                                                            | The procedure is performed following recommendations for confirmed COVID-19 patients, the swab test is delayed to the postoperative period |
| <b>Do you transfer patients requiring expedite surgery?</b>                                                                                | Yes                                                                                                                                        |
|                                                                                                                                            | No                                                                                                                                         |
| <b>How many members of your department suffered confirmed COVID-19 infection?</b>                                                          |                                                                                                                                            |
