# Supplementary material for: Patients awaiting surgery for neurosurgical diseases during the first wave of the COVID-19 pandemic in Spain: a multicentre cohort study
Source: HighWire-hosted journal article supplement (doi:10.1136/bmjopen-2022-061208), 2022-08-01
Supplement: bmjopen-2022-061208supp002_data_supplement.pdf [file bmjopen-2022-061208supp002_data_supplement.pdf]

| PATIENT'S BASELINE CHARACTERISTICS                                     |                                                                                       |
|------------------------------------------------------------------------|---------------------------------------------------------------------------------------|
| <b>Record ID</b>                                                       |                                                                                       |
| <b>Sex</b>                                                             | Male                                                                                  |
|                                                                        | Female                                                                                |
| <b>Age</b>                                                             |                                                                                       |
| <b>Weight</b>                                                          |                                                                                       |
| <b>BMI</b>                                                             |                                                                                       |
| <b>ASA grade</b>                                                       | Grade I, A normal healthy patient                                                     |
|                                                                        | Grade II, A patient with mild systemic disease                                        |
|                                                                        | Grade III, A patient with severe systemic disease                                     |
|                                                                        | Grade IV, A patient with severe systemic disease that is a constant threat to life    |
|                                                                        | Grade V, A moribund patient who is not expected to survive without the operation      |
|                                                                        | Unknown                                                                               |
| <b>Karnofsky Performance Status Scale (only for oncology patients)</b> | 100 Normal no complaints; no evidence of disease                                      |
|                                                                        | 90 Able to carry on normal activity; minor signs or symptoms of disease               |
|                                                                        | 80 Normal activity with effort; some signs or symptoms of disease                     |
|                                                                        | 70 Cares for self; unable to carry on normal activity or to do active work            |
|                                                                        | 60 Requires occasional assistance, but is able to care for most of his personal needs |
|                                                                        | 50 Requires considerable assistance and frequent medical care                         |
|                                                                        | 40 Disabled; requires special care and assistance                                     |
|                                                                        | 30 Severely disabled; hospital admission is indicated although death not imminent     |
|                                                                        | 20 Very sick; hospital admission necessary; active supportive treatment necessary     |
|                                                                        | 10 Moribund; fatal processes progressing rapidly                                      |
| <b>Medical past history</b>                                            | None                                                                                  |
|                                                                        | Hypertension                                                                          |
|                                                                        | Diabetes                                                                              |
|                                                                        | Dyslipidemia                                                                          |
|                                                                        | Current smoker                                                                        |
|                                                                        | Asthma                                                                                |
|                                                                        | Cancer                                                                                |
|                                                                        | Chronic kidney disease                                                                |
|                                                                        | Chronic obstructive pulmonary disease                                                 |
|                                                                        | Congenital abnormalities (cardiac)                                                    |
|                                                                        | Congenital abnormalities (non cardiac)                                                |
|                                                                        | Ischemic heart disease                                                                |
|                                                                        | Congestive heart failure                                                              |
|                                                                        | Obesity                                                                               |
|                                                                        | Dementia                                                                              |
|                                                                        | Peripheral vascular disease                                                           |
| Stroke/TIA                                                             |                                                                                       |
| Other                                                                  |                                                                                       |

| NEUROSURGICAL DISEASE                                                                   |                                     |
|-----------------------------------------------------------------------------------------|-------------------------------------|
| <b>Record ID</b>                                                                        |                                     |
| <b>Main group</b>                                                                       | Oncology                            |
|                                                                                         | Hemorrhagic cerebrovascular disease |
|                                                                                         | Traumatic brain injury              |
|                                                                                         | Traumatic spine injury              |
|                                                                                         | Degenerative spine disease          |
|                                                                                         | CSF disorders                       |
|                                                                                         | Pediatric                           |
|                                                                                         | Functional                          |
|                                                                                         | Infectious                          |
| <b>In cases of hemorrhagic cerebrovascular disease, the symptom at diagnosis was...</b> | Cerebral hematoma                   |
|                                                                                         | Seizure                             |
|                                                                                         | Steal                               |
|                                                                                         | Asymptomatic                        |
| <b>Specific hemorrhagic cerebrovascular disease</b>                                     | Aneurysm                            |
|                                                                                         | AVM                                 |
|                                                                                         | Dural AV fistula                    |
|                                                                                         | Cavernoma                           |
|                                                                                         | Hypertensive hematoma               |
|                                                                                         | Malignant stroke                    |
| <b>Neoplasm location</b>                                                                | Supratentorial intracerebral        |
|                                                                                         | Supratentorial extracerebral        |
|                                                                                         | Intraventricular                    |
|                                                                                         | Infratentorial intracerebral        |
|                                                                                         | Infratentorial extracerebral        |
|                                                                                         | Sellar region                       |
|                                                                                         | Spinal                              |
| <b>Neoplasm histology</b>                                                               | Low-grade Glioma (WHO I and II)     |
|                                                                                         | High-grade Glioma (WHO III and IV)  |
|                                                                                         | Meningioma (WHO I)                  |
|                                                                                         | Meningioma (WHO II and III)         |
|                                                                                         | Metastasis                          |
|                                                                                         | Lymphoma                            |
|                                                                                         | Schwannoma                          |
|                                                                                         | Pituitary adenoma                   |
|                                                                                         | Other                               |
| <b>Planned surgery is considered...</b>                                                 | Primary curative                    |
|                                                                                         | Surgery for relapse disease         |
| <b>Determine the level of the spine affected by the degenerative disease</b>            | Cervical                            |
|                                                                                         | Dorsal                              |
|                                                                                         | Lumbar                              |

|                                                                       |                                             |
|-----------------------------------------------------------------------|---------------------------------------------|
| <b>Specific pediatric pathology</b>                                   | Supratentorial intracerebral tumor          |
|                                                                       | Supratentorial extracerebral tumor          |
|                                                                       | Intraventricular tumor (I-III ventricle)    |
|                                                                       | Infratentorial intracerebral tumor          |
|                                                                       | Infratentorial extracerebral tumor          |
|                                                                       | Intraventricular infratentorial tumor       |
|                                                                       | Sellar region                               |
|                                                                       | Hydrocephalus                               |
|                                                                       | Intraventricular hemorrhage                 |
|                                                                       | Arachnoid cyst                              |
|                                                                       | Craniosynostosis (one suture)               |
|                                                                       | Craniosynostosis (multiple sutures)         |
|                                                                       | Occipito-cervical junction disorder         |
|                                                                       | Simple lipoma                               |
|                                                                       | Complex lipoma                              |
| Vascular                                                              |                                             |
| <b>Specific functional pathology</b>                                  | Parkinson and other movement disorder       |
|                                                                       | Epilepsy                                    |
|                                                                       | Pain                                        |
| <b>Specific infectious pathology</b>                                  | Brain abscess                               |
|                                                                       | Epidural/ subdural cranial empyema          |
|                                                                       | Epidural/ subdural spinal empyema           |
|                                                                       | Superficial surgical site cranial infection |
|                                                                       | Superficial surgical site spine infection   |
|                                                                       | Osteosynthesis-associated infection         |
|                                                                       | Osteomyelitis                               |
| <b>Date of diagnosis</b>                                              |                                             |
| <b>Date of inclusion in surgical list</b>                             |                                             |
| <b>Urgency of surgery</b>                                             | Immediate                                   |
|                                                                       | Urgent                                      |
|                                                                       | Expedited                                   |
|                                                                       | Elective                                    |
| <b>Confirm if it was the initial decision for surgical treatment?</b> | Yes                                         |
|                                                                       | No                                          |

| <b>TREATMENT DECISION AND EFFECTS OF THE PANDEMIC</b>                                                                           |                                                                                                         |
|---------------------------------------------------------------------------------------------------------------------------------|---------------------------------------------------------------------------------------------------------|
| <b>Record ID</b>                                                                                                                |                                                                                                         |
| <b>Did the patient undergo any neurosurgical procedure during the pandemic?</b>                                                 | Yes                                                                                                     |
|                                                                                                                                 | No                                                                                                      |
| <b>Which of the following reasons was the most influencing one to maintain your indication?</b>                                 | Imminent effect on survival or suspect of malignancy                                                    |
|                                                                                                                                 | Mass effect in neuroimaging/ progressive neurological decline                                           |
|                                                                                                                                 | There is no reduction in hospital resources due to pandemic                                             |
|                                                                                                                                 | Patients assume excess of risk of being operated during the pandemic regardless surgeon recommendations |
| <b>Although the patient was operated during the pandemic, do you consider that the pandemic has affect the surgery someway?</b> | No change to care                                                                                       |
|                                                                                                                                 | Delayed surgery                                                                                         |
|                                                                                                                                 | Advanced surgery                                                                                        |
|                                                                                                                                 | Change in the surgical technique                                                                        |
|                                                                                                                                 | Transfer to a COVID-free center                                                                         |
|                                                                                                                                 | Neoadyuvancy was administered while the patient was waiting for the procedure.                          |
| <b>If no operation was performed by 3 months from study entry, is there still a plan for surgery?</b>                           | Yes                                                                                                     |
|                                                                                                                                 | No                                                                                                      |
| <b>What was/were the main reason/s to not performed any operation by 3 months from study?</b>                                   | Patient choice to avoid surgery during pandemic                                                         |
|                                                                                                                                 | Surgeon decision to delay surgery due to risk to patient                                                |
|                                                                                                                                 | No bed/intensive care space/theatre space                                                               |
|                                                                                                                                 | Disease progression, surgery no longer indicated                                                        |
|                                                                                                                                 | SARS-CoV2 detection in the preoperative screening                                                       |
|                                                                                                                                 | Change in clinical status unrelated to neurosurgical pathology                                          |
|                                                                                                                                 | Died awaiting surgery                                                                                   |
| Other reason                                                                                                                    |                                                                                                         |

| PERIOPERATIVE DETAILS                                               |                                                      |
|---------------------------------------------------------------------|------------------------------------------------------|
| <b>Record ID</b>                                                    |                                                      |
| <b>GCS</b>                                                          |                                                      |
| <b>GCS- motor response</b>                                          | Obeys commands                                       |
|                                                                     | Localising                                           |
|                                                                     | Normal flexion                                       |
|                                                                     | Abnormal flexion                                     |
| <b>GCS- verbal reponse</b>                                          | Extension                                            |
|                                                                     | None                                                 |
|                                                                     | Orientated                                           |
|                                                                     | Confused                                             |
|                                                                     | Words                                                |
|                                                                     | Sounds                                               |
| <b>GCS- Eye opening</b>                                             | None                                                 |
|                                                                     | Spontaneous                                          |
| <b>Preoperative focal deficits due to neurosurgical pathology</b>   | To sound                                             |
|                                                                     | To pressure                                          |
|                                                                     | None                                                 |
|                                                                     | None                                                 |
|                                                                     | Language                                             |
|                                                                     | Motor                                                |
|                                                                     | Sensitivity                                          |
|                                                                     | Visual acuity                                        |
|                                                                     | Cognitive                                            |
|                                                                     | Cranial nerves palsy                                 |
|                                                                     | Cerebellar syndrome                                  |
|                                                                     | Spinal cord syndrome                                 |
|                                                                     | Radiculopathy                                        |
| Non testable due to level of consciousness                          |                                                      |
| <b>Preoperative airway support</b>                                  | None / nasal prongs                                  |
|                                                                     | Venturi mask                                         |
|                                                                     | Non-invasive high pressure respiratory support       |
|                                                                     | Mechanical ventilation                               |
|                                                                     | OMECS                                                |
| <b>Was COVID-19 infection suspected at the time of the surgery?</b> | Yes                                                  |
|                                                                     | No                                                   |
| <b>Reason to suspect COVID-19 infection</b>                         | Symptoms                                             |
|                                                                     | Recent close contact to a confirmed COVID 19 patient |
|                                                                     | Laboratory findings                                  |
|                                                                     | Thorax imaging                                       |

|                                                                                         |                            |
|-----------------------------------------------------------------------------------------|----------------------------|
| <b>Symptoms of suspicion</b>                                                            | Fever                      |
|                                                                                         | Cough                      |
|                                                                                         | Dyspnea                    |
|                                                                                         | Anosmia                    |
|                                                                                         | Abdominal pain or diarrhea |
|                                                                                         | Nausea/vomits              |
|                                                                                         | Tiredness/ muscle aches    |
| <b>CT thorax findings</b>                                                               | Not done                   |
|                                                                                         | Normal                     |
|                                                                                         | Consolidation              |
|                                                                                         | Ground glass opacity       |
|                                                                                         | Linear opacity             |
|                                                                                         | Other                      |
| <b>Swab test result in suspect patients</b>                                             | Positive                   |
|                                                                                         | Negative                   |
|                                                                                         | Not done                   |
| <b>In absence of COVID19 suspicion, was COVID19 screening performed preoperatively?</b> | Yes                        |
|                                                                                         | No                         |
| <b>Type of screening test</b>                                                           | Structured survey          |
|                                                                                         | Swab test                  |
|                                                                                         | CT thorax                  |
| <b>Date of screening test</b>                                                           |                            |
| <b>Swab test result in non- suspect patients</b>                                        | Positive                   |
|                                                                                         | Negative                   |
|                                                                                         | Not done                   |
| <b>Chest X ray findings in non-suspect patients</b>                                     | Not done                   |
|                                                                                         | Normal                     |
|                                                                                         | Abnormal                   |
| <b>CT thorax findings in non-suspect patients</b>                                       | Not done                   |
|                                                                                         | Normal                     |
|                                                                                         | Consolidation              |
|                                                                                         | Ground glass opacity       |
|                                                                                         | Linear opacity             |
|                                                                                         | Other                      |
| <b>Date of surgery</b>                                                                  |                            |
| <b>Anaesthesia</b>                                                                      | General                    |
|                                                                                         | Regional                   |
|                                                                                         | Local                      |

|                                               |                                                    |
|-----------------------------------------------|----------------------------------------------------|
| <b>Operation performed?</b>                   | Supratentorial craniotomy                          |
|                                               | Infratentorial craniotomy                          |
|                                               | Endoscopic trans-sphenoidal                        |
|                                               | Burr-holes                                         |
|                                               | CSF diversion                                      |
|                                               | Spine surgery (oncology)                           |
|                                               | Spine surgery (non-oncology) with stabilization    |
|                                               | Spine surgery (non-oncology) without stabilization |
|                                               | Intraventricular endoscopy                         |
|                                               | Craniofacial remodeling                            |
|                                               | ICP monitoring/ external ventricular drainage      |
|                                               | Deep brain stimulation                             |
|                                               | Vague nerve stimulation device                     |
|                                               | Other                                              |
| <b>Operative time (minutes)</b>               |                                                    |
| <b>Surgical resources used at the theatre</b> | None especial                                      |
|                                               | Neuronavigation                                    |
|                                               | Neurophysiological monitoring                      |
|                                               | Tractography                                       |
|                                               | Specific fluorescence                              |
|                                               | Intraoperative echography                          |
|                                               | Intraoperative MRI                                 |
|                                               | Awake surgery                                      |
|                                               | Cortical mapping                                   |
| <b>Opinion about surgical conditions</b>      | No change to care                                  |
|                                               | Reduced with direct effect on outcome              |
|                                               | Reduced without effect on outcome                  |

| POSTOPERATIVE COURSE                 |                                                              |
|--------------------------------------|--------------------------------------------------------------|
| <b>Record ID</b>                     |                                                              |
| <b>Postoperative ICU stay</b>        | No                                                           |
|                                      | Planned before theatre                                       |
|                                      | No planned, due to intraop findings                          |
|                                      | No planned, due to postop complications                      |
| <b>Post-operative airway support</b> | None / nasal prongs                                          |
|                                      | Venturi mask                                                 |
|                                      | Non-invasive high pressure respiratory support               |
|                                      | Mechanical ventilation                                       |
|                                      | OMECC                                                        |
| <b>Re-operation</b>                  | Yes                                                          |
|                                      | No                                                           |
| <b>Complications</b>                 | None                                                         |
|                                      | Acute renal injury (creatinine >2mg/dl)                      |
|                                      | Respiratory failure/ Pneumonia                               |
|                                      | Blood transfusion                                            |
|                                      | Cardiac arrest                                               |
|                                      | Neurological new focal symptoms                              |
|                                      | Deep vein thrombosis                                         |
|                                      | Pulmonary thromboembolism                                    |
|                                      | Myocardial infarction                                        |
|                                      | Sepsis                                                       |
|                                      | Septic shock                                                 |
|                                      | Stroke/TIA                                                   |
|                                      | SSI superficial                                              |
|                                      | SSI deep                                                     |
|                                      | Meningitis                                                   |
|                                      | Urinary tract infection                                      |
|                                      | CSF leak                                                     |
|                                      | Postoperative hematoma (asymptomatic)                        |
|                                      | Postoperative hematoma (symptomatic but not requiring re-op) |
|                                      | Postoperative hematoma requiring re-op                       |
| Seizure                              |                                                              |
| Status epilepticus                   |                                                              |
| Other                                |                                                              |
| <b>Date of hospital discharge</b>    |                                                              |



| <b>OUTCOME</b>                                     |                                                                                         |
|----------------------------------------------------|-----------------------------------------------------------------------------------------|
| <b>Record ID</b>                                   |                                                                                         |
| <b>Mortality</b>                                   | Yes                                                                                     |
|                                                    | No                                                                                      |
| <b>Situation at the end of the period of study</b> | Alive, in-hospital                                                                      |
|                                                    | Alive, admitted at other hospital                                                       |
|                                                    | Alive, at rehabilitation nursing                                                        |
|                                                    | Alive, at home                                                                          |
| <b>Outcome of patients awaiting surgery</b>        | No clinical worsening or radiological progression                                       |
|                                                    | No clinical worsening but the patient experienced radiological progression              |
|                                                    | Clinical worsening without radiological progression                                     |
|                                                    | Clinical worsening and radiological progression                                         |
|                                                    | Change in clinical status unrelated to neurosurgical pathology or COVID19 infection     |
|                                                    | Death due to neurosurgical disease progression                                          |
|                                                    | Death unrelated to neurosurgical pathology or COVID19 infection (new medical condition) |
|                                                    | Death due to accident                                                                   |
| Death related to COVID-19 or its complications     |                                                                                         |
| <b>Date of death</b>                               | On table                                                                                |
|                                                    | Postoperative day 0-7                                                                   |
|                                                    | Postoperative day 8-30                                                                  |
|                                                    | Postoperative >30                                                                       |
|                                                    | Death in a non-operated patients                                                        |
| <b>Cause of death</b>                              | Death due to neurosurgical disease                                                      |
|                                                    | Death unrelated to neurosurgical pathology or COVID19 infection (new medical condition) |
|                                                    | Death related to COVID-19 or its complications                                          |
|                                                    | Unknown                                                                                 |

| <b>CONFIRMED COVID-19 INFECTION</b>                         |                                                                                                                                              |
|-------------------------------------------------------------|----------------------------------------------------------------------------------------------------------------------------------------------|
| <b>Record ID</b>                                            |                                                                                                                                              |
| <b>Did the patient suffered COVID-19 post-operatively ?</b> | Yes                                                                                                                                          |
|                                                             | No                                                                                                                                           |
| <b>When was detected a confirmed COVID-19 infection?</b>    | Awaiting surgery                                                                                                                             |
|                                                             | Preoperative screening                                                                                                                       |
|                                                             | During in-hospital stay                                                                                                                      |
|                                                             | After hospital discharge within 30 days                                                                                                      |
|                                                             | After hospital discharge > 30 days                                                                                                           |
| <b>Date of positive swab test</b>                           |                                                                                                                                              |
| <b>Severity of COVID-19 infection</b>                       | Mild: patient was not admitted to hospital care                                                                                              |
|                                                             | Moderate: patient required hospital admission but not airway support                                                                         |
|                                                             | Severe: those patients that required airway support (at least venturi mask) or ICU admission or suffered severe thromboembolic complications |
| <b>Prognostic factors related to COVID-19 outcome</b>       | Respiratory rate                                                                                                                             |
|                                                             | Heart rate                                                                                                                                   |
|                                                             | SBP                                                                                                                                          |
|                                                             | DBP                                                                                                                                          |
|                                                             | Peripheric O2 saturation                                                                                                                     |
|                                                             | Hemoglobin                                                                                                                                   |
|                                                             | Leucocytes                                                                                                                                   |
|                                                             | Linfocytes                                                                                                                                   |
|                                                             | C reactive protein                                                                                                                           |
|                                                             | Albumin                                                                                                                                      |
|                                                             | Ure                                                                                                                                          |
|                                                             | Creatinine                                                                                                                                   |
|                                                             | Ferritin                                                                                                                                     |
|                                                             | LDH                                                                                                                                          |
|                                                             | D dimer                                                                                                                                      |
|                                                             | Arterial gasometry pO2                                                                                                                       |
|                                                             | Arterial gasometry pCO2                                                                                                                      |
| Arterial gasometry pO2 Lactate                              |                                                                                                                                              |
| Arterial gasometry pO2 Bicarbonate                          |                                                                                                                                              |
| <b>Did the patient receive NSAIDS</b>                       | No                                                                                                                                           |
|                                                             | Yes, preoperatively                                                                                                                          |
|                                                             | Yes, after admission                                                                                                                         |
|                                                             | Both                                                                                                                                         |
| <b>Specific treatment for COVID19 infection</b>             | Antibiotics                                                                                                                                  |
|                                                             | Lopinavir/ritonavir                                                                                                                          |
|                                                             | Quinine                                                                                                                                      |
|                                                             | Corticosteroids                                                                                                                              |
|                                                             | Interferon                                                                                                                                   |
|                                                             | IV immunoglobulines                                                                                                                          |
| Anti-IL6                                                    |                                                                                                                                              |

|                                                        |                                                |
|--------------------------------------------------------|------------------------------------------------|
|                                                        | Anti-IL1                                       |
|                                                        | Remdesivir                                     |
|                                                        | Antibodies                                     |
| <b>Highest airway support during COVID19 infection</b> | None / nasal prongs                            |
|                                                        | Venturi mask                                   |
|                                                        | Non-invasive high pressure respiratory support |
|                                                        | Mechanical ventilation                         |
|                                                        | OMECC                                          |
| <b>Days of invasive mechanical ventilation</b>         |                                                |
| <b>Renal dialysis during admission?</b>                | Yes                                            |
|                                                        | No                                             |
|                                                        |                                                |
